# Supplementary material for: Ion cross-linking assisted synthesis of ZIF-8/chitosan/melamine sponge with anti-biofouling activity for enhanced uranium recovery
Source: Royal Society of Chemistry journal article supplement (doi:10.1039/d1qi01203g), 2021-11-09
Supplement: d1qi01203g1.pdf [file d1qi01203g1.pdf]

*Electronic Supplementary Information for*

**Ion cross-linking assisted synthesis ZIF-8/chitosan/melamine  
sponge with anti-biofouling activity for enhanced uranium  
recovery**

*Xuejie Guo<sup>a,b</sup>, Haocheng Yang<sup>a,b,\*</sup> and Jun Wang<sup>b,\*</sup>*

<sup>a</sup>School of Environmental Science and Engineering, Yancheng Institute of Technology, Yancheng,  
224051, PR China.

<sup>b</sup>College of Materials Science and Chemical Engineering, Harbin Engineering University, Harbin,  
150001, PR China.

*\*Correspondence authors: E-mail: yanghaocheng@ycit.edu.cn; zhqw1888@sohu.com*

## SI Experimental section

### SI.1 Materials

Zinc nitrate hexahydrate, glutaraldehyde and methanol were obtained from Tianjin Guangfu Fine Chemical Co., Ltd., China. Chitosan and 2-methylimidazole (HMeIM) were purchased from Shanghai Aladdin Biochemical Technology Co., Ltd., China. The marine algae (*Nitzschia*) were obtained from the Center for Collections of Marine Algae (CCMA).

### SI.2 Synthesis of ZIF-8 nanoparticles

The 24 mL of methanol solution containing  $\text{Zn}(\text{NO}_3)_2 \cdot 6\text{H}_2\text{O}$  (2.5 mmol) was added into 40 mL of 2-methylimidazole (20 mmol) methanol solution, followed by stirring at 25 °C for 4 h. Then, the white precipitate was obtained by high-speed centrifugal separation and washed with methanol three times, and dried at 60 °C for 24 h. The obtained product was ZIF-8 (Z8) nanoparticles as the control sample.

### SI.3 Instrumentation

The morphology and structure of the sponges and pure ZIF-8 nanoparticles were characterized by a field emission scanning electron microscope (SEM, Hitachi S4800) and transmission electron microscope (TEM, JEOL, JEM-2010), respectively. The X-ray diffraction (XRD) patterns were taken in a Rigaku D/max-IIIB diffractometer (Tokyo) using nickel-filtered  $\text{Cu K}_\alpha$  radiation at 40 kV, 150 mA. X-ray photoelectron spectroscopy (XPS) measurements were performed using a PHI 5700 ESCA spectrometer with Al KR radiation ( $h\nu = 1486.6 \text{ eV}$ ). Fourier-transform infrared (FTIR) spectra were recorded to analyze the surface characteristics of the materials by an Avater 370 FTIR spectrophotometer in the  $500\text{--}4000 \text{ cm}^{-1}$  region. Nitrogen adsorption isotherm was measured at 77 K using Quantachrome NOVAtouchTM. Degassing of the sample was performed at 393.15K for 4 h before adsorption measurements. The algae cell concentration was observed via an optical microscope (Leica DML 300B,

Germany) and fluorescence microscope (Nikon Ci-L 710375). The Zeta potential test was using Zetasizer NanoPlus. The concentration of U(VI) at mg/L or µg/L level was determined using Inductively Coupled Plasma-Atomic Emission Spectroscopy ((ICP-AES, Optima-7000 DV) or Inductively Coupled Plasma-Mass Spectrometry (ICP-MS, Bruker 820-MS).

#### SI.4 Anti-biofouling assays

The common diatoms, *Nitzschia*, were selected as the fouling bio-template to confirm the antifouling properties of Z8, MS, CMZn and CMZ8 sponges. The *Nitzschia* cells were obtained from the Center for Collections of Marine Algae of Xiamen University, (Pearl River Estuary, China) and cultured in artificial seawater-based culture media with a 12:12 h light: dark (L/D) cycle of fluorescent illumination (2000 lux), followed by stirring twice daily at 21±2°C. The products were sterilized for 2 h by ultraviolet irradiation. When the number of cells is 10<sup>5</sup> cells/mL, 10 mg of products and 50 mL of cell suspension were co-cultured for defined time periods in a biochemical incubator. The *Nitzschia* cell concentration was counted on a cell count chamber hemocytometer. All of the experiments were performed in triplicate.

#### SI.5 Batch adsorption experiments

The actual adsorption properties of Z8, MS, CMZn and CMZ8 sponges were determined by a series of batch experiments. The stock solution of uranium was prepared with different pHs by adjusting (0.1 M HNO<sub>3</sub> and Na<sub>2</sub>CO<sub>3</sub>). 10 mg of the obtained samples were put into 50 mL of UO<sub>2</sub>(NO<sub>3</sub>)<sub>2</sub>·6H<sub>2</sub>O solution (C<sub>U-initial</sub>= 50 mg/L) with different pH and vibrated at 25°C for 12 h. The adsorbents were separated and the residual U(VI) concentration in solutions were tested via ICP-AES. The adsorption amount ( $q_e$ ) and removal rate ( $R$ ) of U (VI) can be expressed by the following:

$$q_e = (C_0 - C_e)V/m \quad (S1)$$

$$R = [(C_0 - C_e)/C_0] \times 100\% \quad (S2)$$

Where  $q_e$  (mg/g) is the saturated adsorption capacity of the samples;  $C_0$  (mg/L) is the initial concentration of U (VI) in the solution;  $C_e$  (mg/L) is the concentration of U (VI) in the supernatant after adsorption equilibrium.

#### **SI.6 Effect of contact time and kinetics study on the U (VI) adsorption of Z8 and CMZ8 sponge**

The following pseudo-first-order, pseudo-second-order and Weber-Morris (W-M) models are employed to interpret the mechanism controlling the sorption process ( $m=10$  mg;  $V=50$  mL;  $pH=8.0$ ;  $T=298$  K;  $C_{U-initial}=50$  mg/L). The linear form of the three models can be expressed by the following:

$$q_e(mg\ g^{-1}) = (C_0 - C_e) \cdot \frac{V}{m} \quad (S3)$$

$$\ln(q_e - q_t) = \ln q_e - k_1 t \quad (S4)$$

$$\frac{t}{q_t} = \frac{1}{q_e^2 k_2} + \frac{t}{q_e} \quad (S5)$$

$$q_e = K_{ip}\sqrt{t} + C \quad (S6)$$

Where  $C_0$  and  $C_e$  (mg L<sup>-1</sup>) are the initial and equilibrium concentrations of U (VI) ions,  $V$  (L) is the volume of the solution and  $m$  is the weight of sorbent (g),  $q_t$  and  $q_e$  (mg g<sup>-1</sup>) are the capacity of U (VI) at time  $t$  (min) and at equilibrium,  $K_{ip}$  is internal diffusion constant, respectively, and  $k_1$  (min<sup>-1</sup>) and  $k_2$  (g mg<sup>-1</sup> min<sup>-1</sup>) are the respective rate constants.

#### **SI.7 The adsorption isotherms study on the U (VI) adsorption of Z8 and CMZ8 sponge**

The adsorption isotherms were also tested with different initial concentration of U (VI) ( $m=10$  mg;  $V=50$  mL;  $pH=8.0$ ;  $T=298$  K;  $t=3$  h;  $C_{U-initial}=5-200$  mg/L). Then, the Langmuir, Freundlich and Dubinin-Radushkevich models were applied to simulate experimental data. The linear form of the three models can be expressed by the following:

$$C_e/q_e = 1/b \cdot q_m + C_e/q_m \quad (S7)$$

$$\ln q_e = \ln k + 1/n \ln C_e \quad (S8)$$

$$\ln q_e = \ln q_m - \beta \varepsilon^2 \quad (S9)$$

$$\varepsilon = RT \ln (1 + 1/C_e) \quad (S10)$$

Where  $C_e$  (mg L<sup>-1</sup>) is the equilibrated U (VI) concentration;  $q_e$  (mg g<sup>-1</sup>) is the amount of U (VI) adsorbed on the capacity of the adsorbent at equilibrium;  $b$  (L mg<sup>-1</sup>) is a Langmuir constant and  $K$  is a Freundlich constant;  $q_m$  (mg g<sup>-1</sup>) is the saturation capacity at complete monolayer coverage;  $\beta$  is the activity coefficient and  $\varepsilon$  is the Polanyi potential.

### SI.8 Adsorption cycle experiments of CMZ8 sponge

Typically, 10 mg of CMZ8 sponge were added into 50 mL of UO<sub>2</sub>(NO<sub>3</sub>)<sub>2</sub>·6H<sub>2</sub>O solution ( $C_{U\text{-initial}}$  = 50 mg/L, pH=8.0) and vibrated at 25°C for 3 h. The CMZ8-U were separated and washed with deionized water for three times; moreover, we collected the supernatant to test by ICP-AES to obtain the concentrations of U (VI). Then, CMZ8-U was added into different desorbents (20 mL, 0.25 mol/L), followed by shaking at 25°C for 6 h. The supernatants were further analysed to obtain the concentrations of U (VI). Afterwards, CMZ8-U was added into 20 mL of EDTA with different concentration, followed by shaking at 25°C for 6 h. The adsorbent is separated from the liquid and the supernatants were analysed to obtain the concentrations of U (VI). The eluent efficiency is calculated by the following formula:

$$C_{ad} = C_0 - C_e \quad (S11)$$

$$D = C_{de}/C_{ad} \times 100\% \quad (S12)$$

Where  $D$  is the eluent efficiency,  $C_{ad}$  and  $C_{de}$  are the U (VI) concentration (mg/L) in the solution after adsorption and desorption, respectively.

Next, the best concentration was selected to carry out the cyclic adsorption-desorption experiment. The adsorbent was washed by deionized water three

times before the next cycle adsorption experiment. The adsorbent was named as CMZ8-Dx (x is the cycles). Repeat this experiment operation for five times.

### **SI.9 Adsorption tests in natural seawater**

We conducted a series of batch experiments in the seawater (Bohai Sea, China) to further evaluated the practical adsorption ability of CMZ8 sponge ( $m = 0.01$  g,  $V = 50$  mL,  $T = 298.15$  K,  $t = 12$  h). The content of adsorbed metal elements was analyzed to determine the competitive adsorption behavior by ICP-MS. Moreover, extra uranium ( $10\text{-}200\text{ }\mu\text{g/L}$ ) was added into natural seawater as radioactive contaminated seawater.

## SII. Characterization of CMZ8 sponge

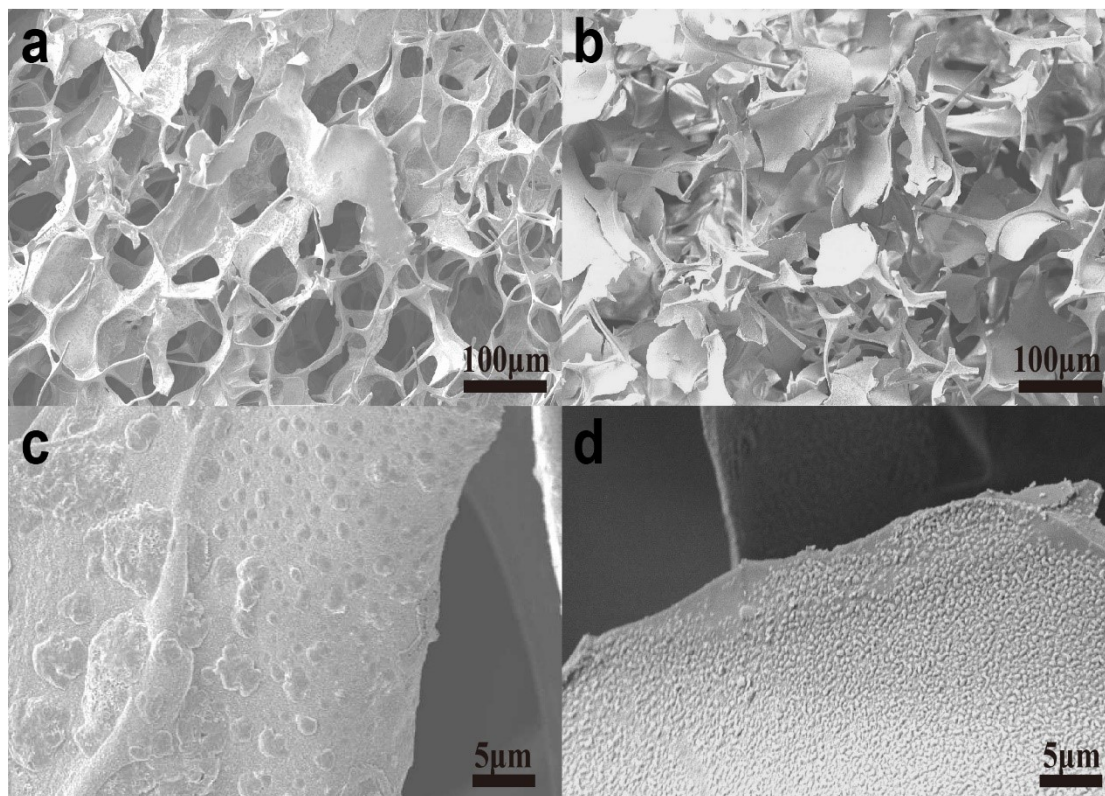

Figure S1 The SEM images of CMZ8-2 (a, c) and CMZ8-6 sponges (b, d)

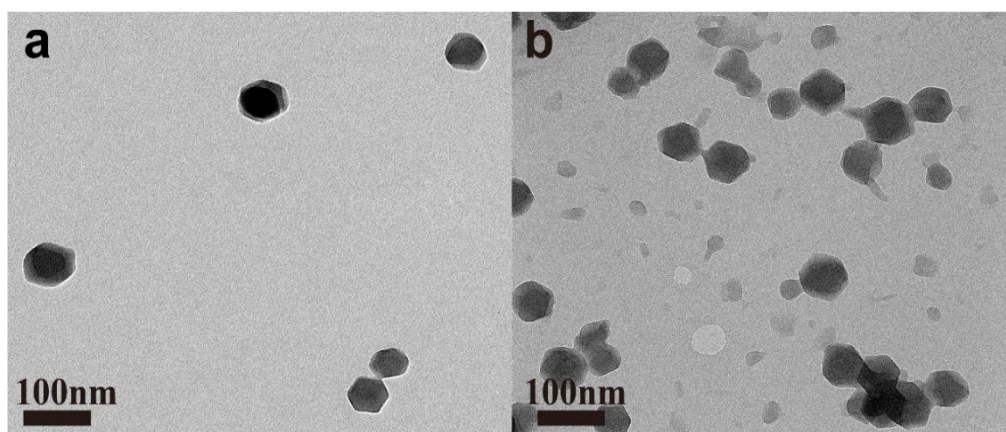

Figure S2 The TEM images of Z8 (a) and CMZ8 sponge (b)

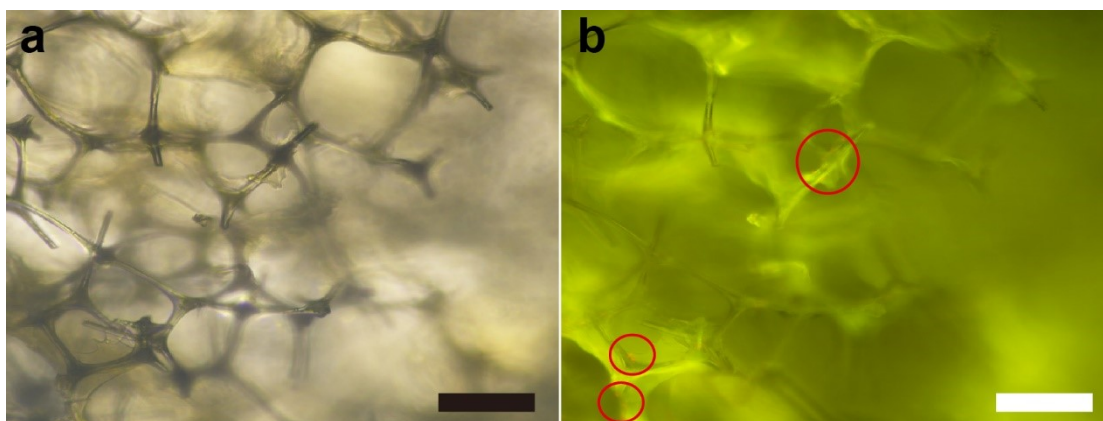

Figure S3 The natural light (a) and fluorescence (b) images of CMZ8 sponge after 7 days  
(all scale bars are 100  $\mu\text{m}$ )

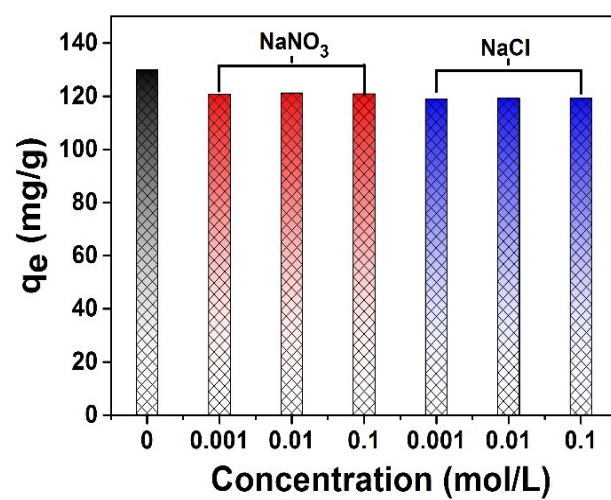

Figure S4 The adsorption amounts of CMZ8 sponges in uranium-containing aqueous solution with different ionic strength ( $T = 298$  K,  $m = 0.01$  g,  $V = 50$  mL,  $C_0 = 50$  mg/L, pH = 8.0)

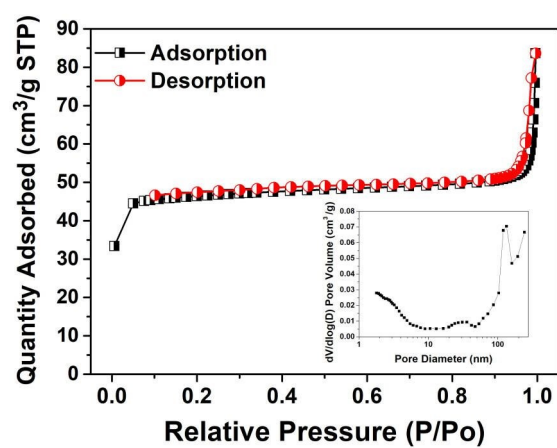

Figure S5 N<sub>2</sub> adsorption-desorption isotherms curve of CMZ8 sponge (insert is pore size distribution curve)

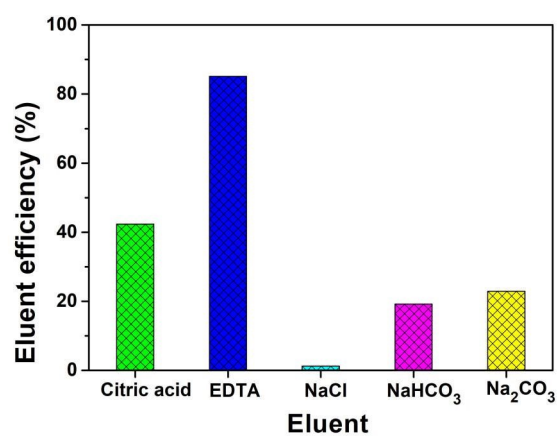

Figure S6 The eluent efficiency of CMZ8 sponge with different desorbents

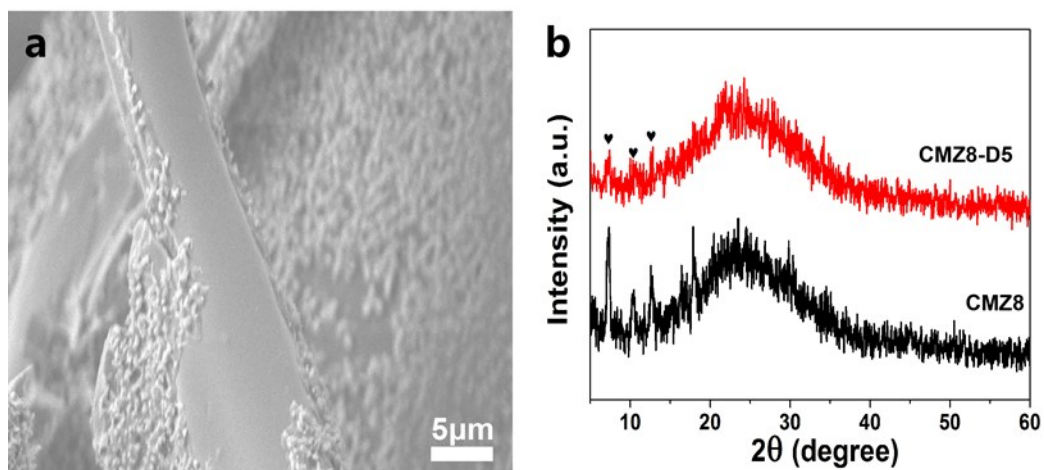

Figure S7 The SEM image of CMZ8-D5 (a); the XRD patterns of CMZ8 and CMZ8-D5 (b)

Table S1 Kinetic parameter for U (VI) adsorption

| Materials | $q_e$ (mg/g)<br>(exp) | Pseudo-first-order    |                               |       | Pseudo-second-order   |                               |       |
|-----------|-----------------------|-----------------------|-------------------------------|-------|-----------------------|-------------------------------|-------|
|           |                       | $q_e$ (mg/g)<br>(cal) | $k_1$<br>(min <sup>-1</sup> ) | $R^2$ | $q_e$ (mg/g)<br>(cal) | $k_2$<br>(min <sup>-1</sup> ) | $R^2$ |
| Z8        | 95.35                 | 36.49                 | 0.01172                       | 0.809 | 97.28                 | 0.00081                       | 0.999 |
| CMZ8      | 130.27                | 62.21                 | 0.01706                       | 0.921 | 136.24                | 0.00054                       | 0.999 |

Table S2 Isotherm parameter for adsorption of U (VI)

| Materials | Freundlich |                      |                | Langmuir              |                       | D-R            |                |
|-----------|------------|----------------------|----------------|-----------------------|-----------------------|----------------|----------------|
|           | n          | K                    | R <sup>2</sup> | q <sub>m</sub>        | b                     | R <sup>2</sup> | R <sup>2</sup> |
|           |            | (L g <sup>-1</sup> ) |                | (mg g <sup>-1</sup> ) | (L mg <sup>-1</sup> ) |                |                |
| Z8        | 1.74       | 12.55                | 0.979          | 180.51                | 0.04                  | 0.997          | 0.634          |
| CMZ8      | 1.77       | 19.59                | 0.991          | 299.40                | 0.04                  | 0.977          | 0.579          |

Table S3 Comparison on the U(VI)-uptake capacity of the CMZ8 with other materials

| Adsorbents                                                    | Adsorption Capacity<br>mg-U/g-adsorbent | Conditions | Ref.              |
|---------------------------------------------------------------|-----------------------------------------|------------|-------------------|
| Cross-linked chitosan                                         | 72.46                                   | pH=3.0     | 1                 |
| Activated carbon                                              | 28.3                                    | pH=3.0     | 2                 |
| Fe <sub>3</sub> O <sub>4</sub> @ZIF-8                         | 523.5                                   | pH=3.0     | 3                 |
| in situ ZIF-8/PAN                                             | 530.3                                   | pH=3.0     | 4                 |
| PPy@ZIF-8                                                     | 534                                     | pH=3.5     | 5                 |
| MIL-101(Cr)                                                   | 27.99                                   | pH=4.0     | 6                 |
| Fe <sub>3</sub> O <sub>4</sub> @AMCA-MIL53(Al)                | 227.3                                   | pH=6.0     | 7                 |
| guanidine-modified<br>polyamidoxime-<br>functionalized fabric | 112.0                                   | pH=8.0     | 8                 |
| Wool-AO@TiO <sub>2</sub>                                      | 113.12                                  | pH=8.0     | 9                 |
| CMZ8 sponge                                                   | 299.4                                   | pH=8.0     | <b>This paper</b> |

## References

1. G. Wang, J. Liu, X. Wang, Z. Xie, N. Deng, Adsorption of uranium (VI) from aqueous solution onto cross-linked chitosan, *J. Hazard. Mater.*, 2009, **168**, 1053-1058.
2. A. Mellah, S. Chegrouche, M. Barkat, The removal of uranium(VI) from aqueous solutions onto activated carbon: Kinetic and thermodynamic investigations, *J. Colloid Interf. Sci.*, 2006, **296**, 434-441.
3. X. Min, W. Yang, Y.F. Hui, C.Y. Gao, S. Dang, Z.M. Sun, Fe<sub>3</sub>O<sub>4</sub>@ZIF-8: a magnetic nanocomposite for highly efficient UO<sub>2</sub>(2+) adsorption and selective UO<sub>2</sub>(2+)/Ln(3+) separation, *Chem. Commun.*, 2017, **53**, 4199.
4. C. Wang, T. Zheng, R. Luo, C. Liu, M. Zhang, J. Li, X. Sun, J. Shen, W. Han, L. Wang. In situ growth of ZIF-8 on PAN fibrous filters for highly efficient U (VI) removal. *ACS Appl. Mater. Inter.*, 2018, **10**, 24164-24171.
5. J. Li, Z. Wu, Q. Duan, A. Alsaedi, T. Hayat, C. Chen, Decoration of ZIF-8 on polypyrrole nanotubes for highly efficient and selective capture of U(VI), *J. Clean. Prod.*, 2018, **204**, 896-905.
6. J.D. Decker, K. Folens, J.D. Clercq, M. Meledina, G.V. Tendeloo, G.D. Laing, P.V.D. Voort, Ship-in-a-bottle CMPO in MIL-101(Cr) for selective uranium recovery from aqueous streams through adsorption, *J. Hazard. Mater.*, 2017, **335**, 1-9.
7. A.A. Alqadami, M. Naushad, Z.A. Allothman, A.A. Ghfar, Novel metal-organic framework (MOF) based composite material for the sequestration of U(VI) and Th(IV) metal ions from aqueous environment, *ACS Appl. Mater. Inter.*, 2017, **9**, 36026-36037.
8. H. Zhang, L. Zhang, X. Han, L. Kuang, D. Hua. Guanidine and amidoxime cofunctionalized polypropylene nonwoven fabric for potential uranium seawater extraction with antifouling property. *Ind. Eng. Chem. Res.*, 2018, **57**, 1662-1670.
9. J. Wen, Q. Li, H. Li, M. Chen, S. Hu, H. Cheng, Nano-TiO<sub>2</sub> imparts amidoximated wool fibers with good antibacterial activity and adsorption capacity for uranium (VI) recovery, *Ind. Eng. Chem. Res.*, 2018, **57**, 1826-1833.
